# Supplementary material for: Sensitive voltammetric detection of caffeine in tea and other beverages based on a DNA-functionalized single-walled carbon nanotube modified glassy carbon electrode
Source: Royal Society of Chemistry journal article supplement (doi:10.1039/c4ay00837e), 2014-01-01
Supplement: c4ay00837e1.pdf [file c4ay00837e1.pdf]

## **Supplemental Information**

### **Sensitive voltammetric detection of caffeine in tea and beverage based on DNA-functionalized single-walled carbon nanotube modified glassy carbon electrode**

**Yanwei Wang <sup>a</sup>, Xiaohan Wei <sup>b</sup>, Fei Wang <sup>\*a</sup>, Ming Li <sup>a</sup>**

*a. Department of Material and Chemistry Engineering, Henan Institute of Engineering, Zhengzhou, 450007, P. R. China, E-mail: [wf2003@zzu.edu.cn](mailto:wf2003@zzu.edu.cn), Tel: +86 0371 67718925, Fax: +86 0371 67718909*

*b. Henan province product quality supervision and inspection institute, Zhengzhou, 450007, P. R. China*

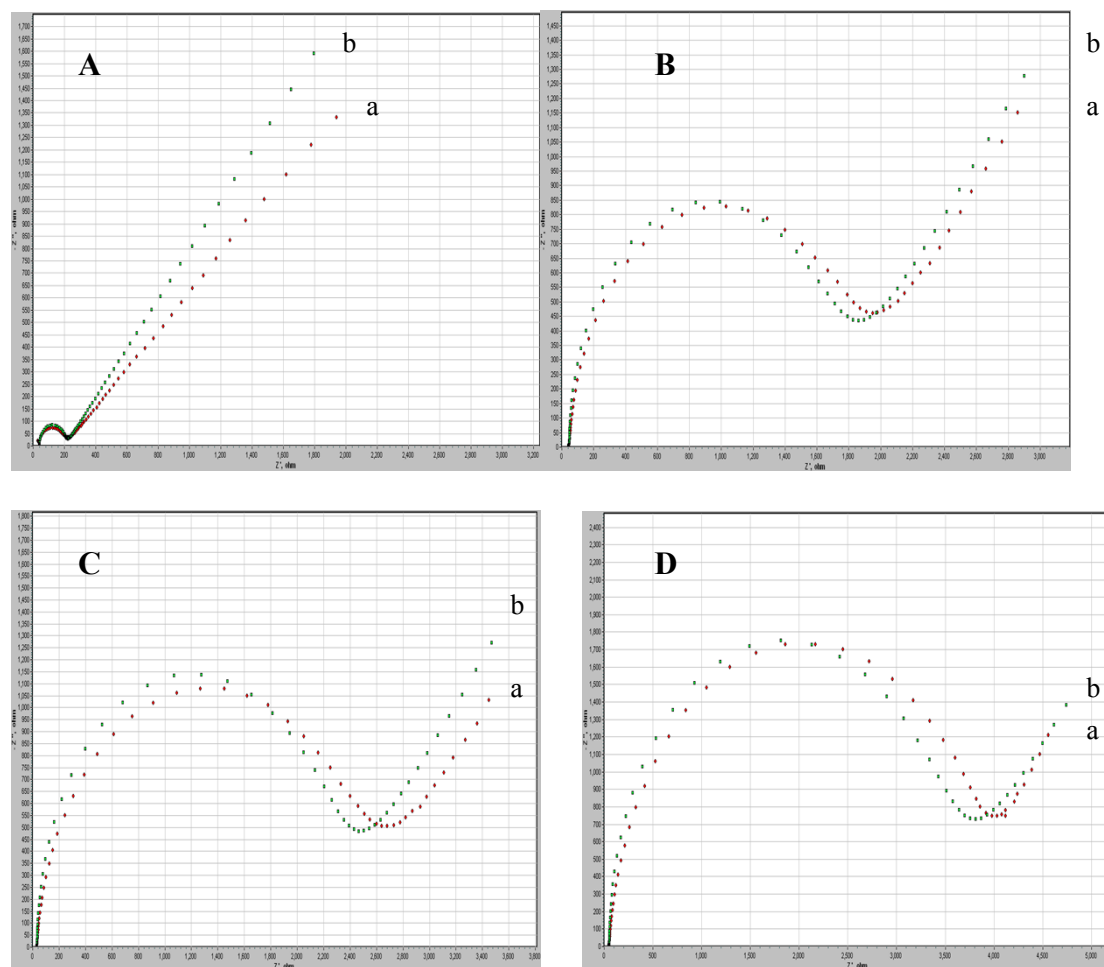

Fig. 1S Electrochemical impedance spectroscopy (curve a) of a bare GCE (A), Nafion/GCE (B), Nafion/SWCNT/GCE (C) and Nafion/DNA-SWCNT/GCE (D) in  $5.0 \times 10^{-3} \text{ mol L}^{-1} [\text{Fe}(\text{CN})_6]^{3-/4-}$  (1:1) solution containing  $0.10 \text{ mol L}^{-1} \text{ KCl}$  and the fit obtained from the equivalent circuit (curve b).
